# Supplementary material for: Harnessing Janus structures: enhanced internal electric fields in C3N5 for improved H2 photocatalysis
Source: Royal Society of Chemistry journal article supplement (doi:10.1039/d4mh01316f), 2024-12-03
Supplement: d4mh01316f1.pdf [file d4mh01316f1.pdf]

## Supporting Information

### **Harnessing Janus structures: enhanced internal electric fields in $C_3N_5$ for improved $H_2$ photocatalysis**

Jianwei Yuan<sup>a</sup>, Su Li<sup>a</sup>, Zhaoifei Dang<sup>a</sup>, Sixia Liu<sup>b</sup>, Fu Yang<sup>c</sup>, Dongguang Wang<sup>b</sup>, Hengcong

Tao<sup>\*,b</sup>, Shuying Gao<sup>\*,b</sup>, and Edison Huixiang Ang<sup>\*,d</sup>

[a] School of Chemical Engineering and Materials, Changzhou Institute of Technology, 666 Liaohe Road (S), Changzhou, 213022, P. R. China

[b] School of Petrochemical Engineering & Environment, Zhejiang Ocean University, Zhoushan 316022, Zhejiang, P. R. China

[c] School of Environmental and Chemical Engineering, Jiangsu University of Science and Technology, Zhenjiang 212003, Jiangsu, P. R. China

[d] Natural Sciences and Science Education, National Institute of Education, Nanyang Technological University, Singapore 637616, Singapore.

\*Corresponding authors; *hengcongtao@zjou.edu.cn* (H. Tao); *gao415127@163.com* (S. Gao); *edison.ang@nie.edu.sg* (E. H. Ang)

## S1. Experimental Section

### 1.1 Photo-electrochemical measurements

The photocurrent, EIS, and Mott-Schottky analyses of Bulk- $\text{C}_3\text{N}_4$ , Bulk- $\text{C}_3\text{N}_5$ , and Janus- $\text{C}_3\text{N}_5$  were conducted using a CHI660C electrochemical workstation with a standard three-electrode system (Pt foil, Ag/AgCl as reference, and working electrodes) in a 0.5 M  $\text{Na}_2\text{SO}_4$  solution.

The photocurrent test was performed with an applied potential of 1.1 V (vs Ag/AgCl). For the EIS test, electrochemical impedance spectroscopy (EIS) measurements were taken over a frequency range of 1 Hz to 0.1 MHz. The Mott-Schottky plots, used to calculate the flat band potential, were recorded at frequencies of 500, 1000, and 1500 Hz.

The working electrodes were prepared by dispersing 5 mg of the photocatalyst into 5 mL of ethyl alcohol solution containing 0.5  $\mu\text{L}$  of Nafion and 0.5  $\mu\text{L}$  of distilled water, followed by sonication for an hour. Then, 1 mL of the resulting slurry was spread on a  $3 \times 1.0$  cm FTO glass and allowed to air dry.

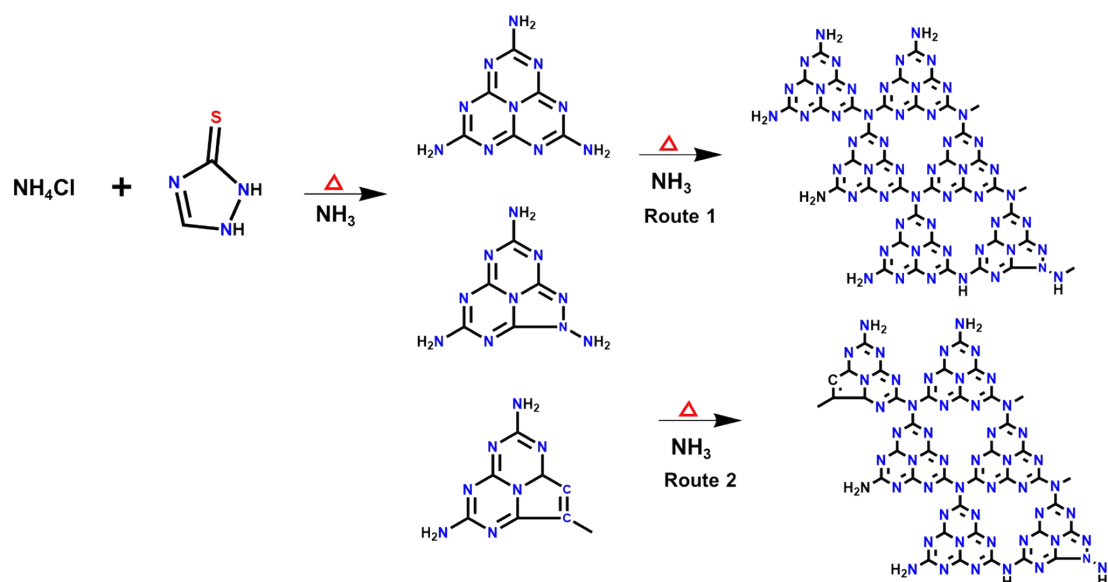

**Fig. S1** The proposed reaction pathways for the formation of the Janus- $\text{C}_3\text{N}_5$  samples.

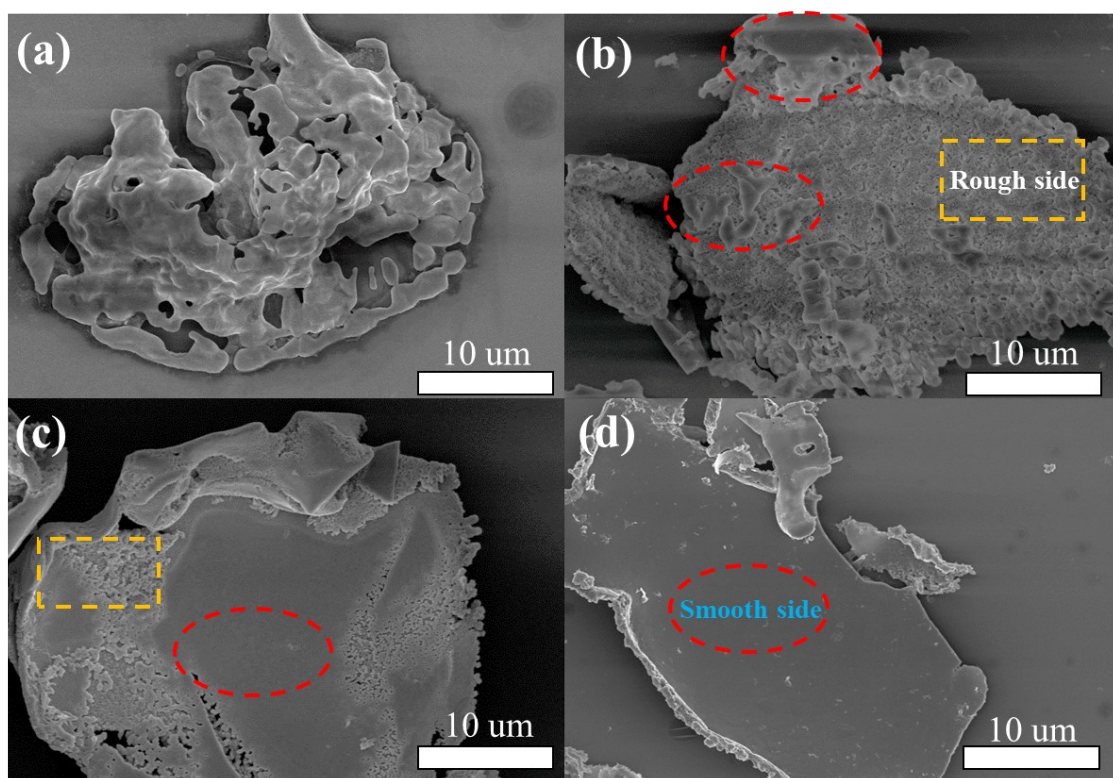

**Fig. S2** The SEM images of the (a) Janus- $\text{C}_3\text{N}_5$ -1h, (b) Janus- $\text{C}_3\text{N}_5$ -2h, (c) Janus- $\text{C}_3\text{N}_5$ -3h, and (d) Janus- $\text{C}_3\text{N}_5$  samples (4 h).

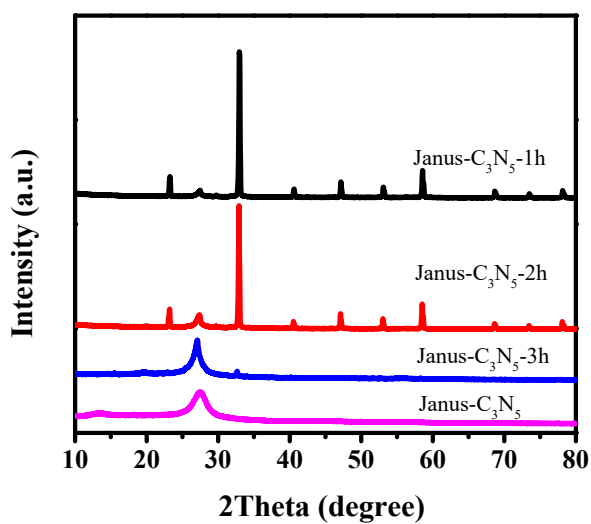

**Fig. S3** The XRD patterns of Janus- $\text{C}_3\text{N}_5$ -1h, Janus- $\text{C}_3\text{N}_5$ -2h, Janus- $\text{C}_3\text{N}_5$ -3h, and Janus- $\text{C}_3\text{N}_5$  samples (4 h).

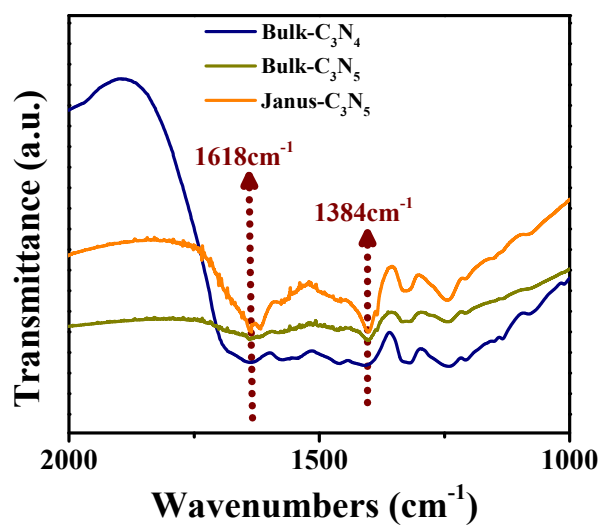

**Fig. S4** FT-IR spectra of Bulk- $\text{C}_3\text{N}_4$ , Bulk- $\text{C}_3\text{N}_5$ , and Janus- $\text{C}_3\text{N}_5$  at (b)  $2000\text{ cm}^{-1}$ - $100\text{ cm}^{-1}$

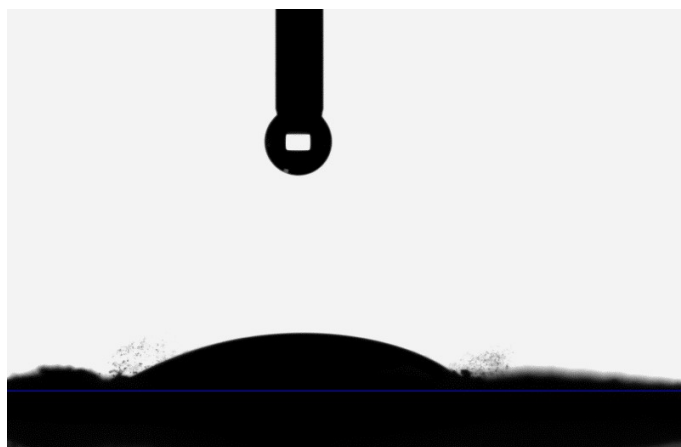

**Fig. S5** The static water contact-angle measurement of Bulk- $\text{C}_3\text{N}_4$ .

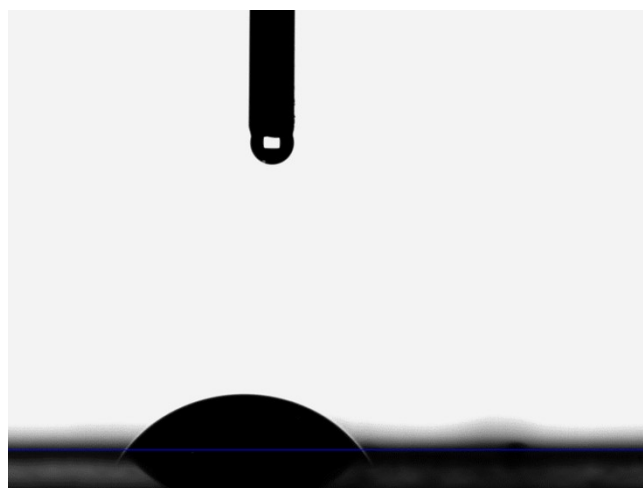

**Fig. S6** The static water contact-angle measurement of Bulk- $\text{C}_3\text{N}_5$ .

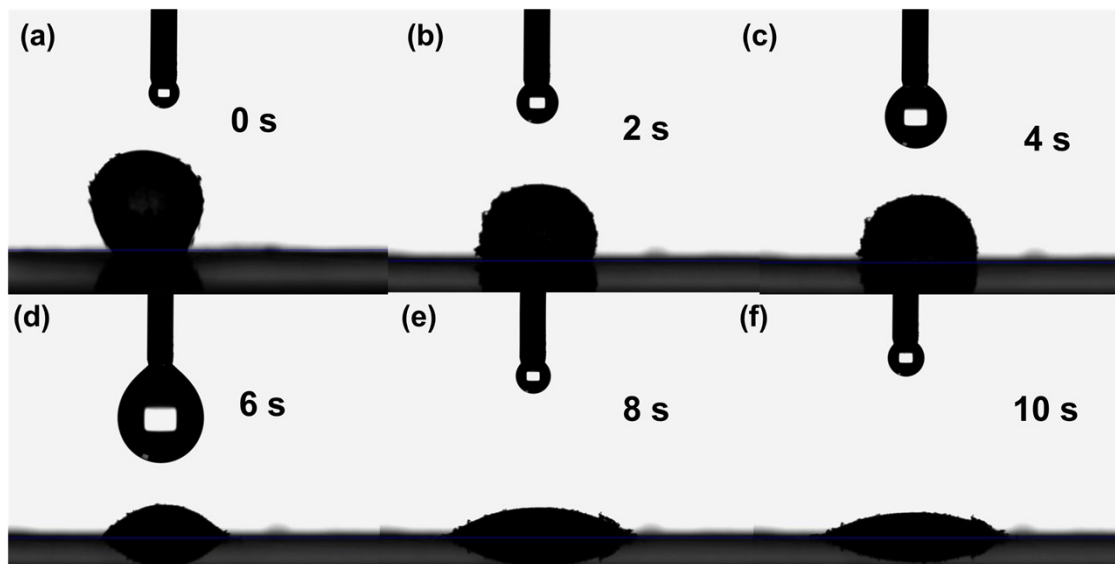

**Fig. S7 (a-f)** The static water contact-angle measurements of Janus-C<sub>3</sub>N<sub>5</sub>.

As illustrated in **Fig. S6**, Bulk-C<sub>3</sub>N<sub>5</sub> maintains a stable static water contact angle over 10 s. In contrast, the static water contact angle of Janus-C<sub>3</sub>N<sub>5</sub> decreases progressively over the same period (**Fig. S7**). Initially, the contact angle is large, with some distortion observed on the surface of the water drop. This phenomenon is likely due to changes in surface tension caused by the different chemical structures, particularly the ultrathin nanosheets of carbon-rich C<sub>3</sub>N<sub>5</sub>. The contact angle then decreases rapidly within 10 s, which can be attributed to water diffusing into the nitrogen-rich honeycomb network of C<sub>3</sub>N<sub>5</sub>. Therefore, the variation in static water contact angle over time further confirms the Janus structure of C<sub>3</sub>N<sub>5</sub>.

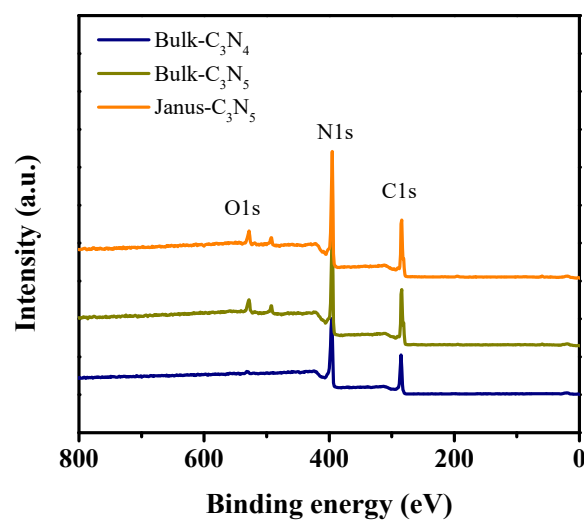

**Fig. S8** The survey XPS spectra of Bulk- $\text{C}_3\text{N}_4$ , Bulk- $\text{C}_3\text{N}_5$ , and Janus- $\text{C}_3\text{N}_5$ .

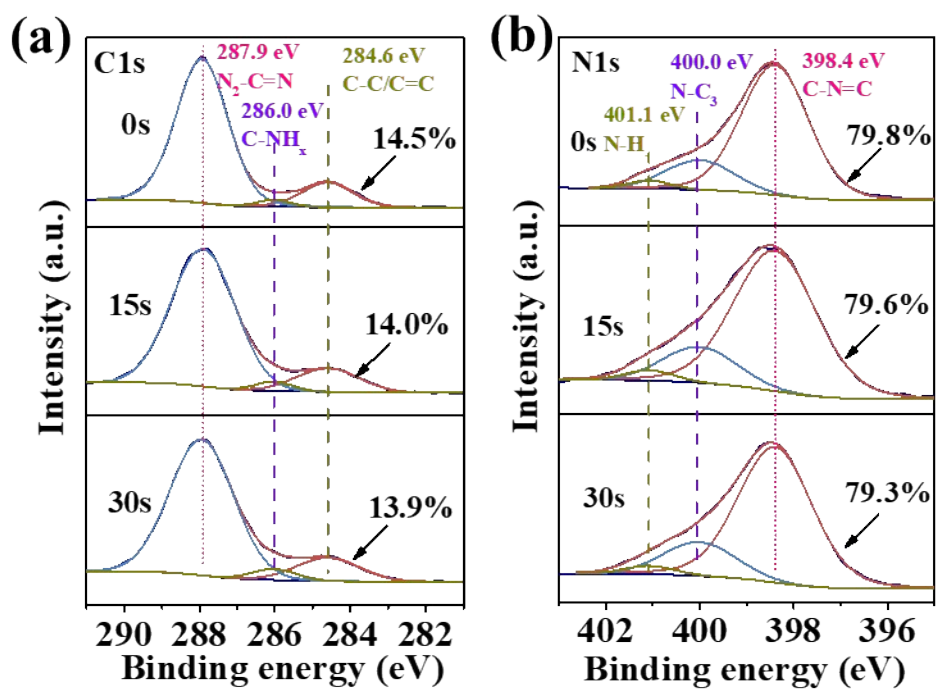

**Fig. S9** (a) The C 1s core level XPS spectra and (b) the N 1s core level XPS spectra of Bulk- $\text{C}_3\text{N}_5$  samples at different etching times.

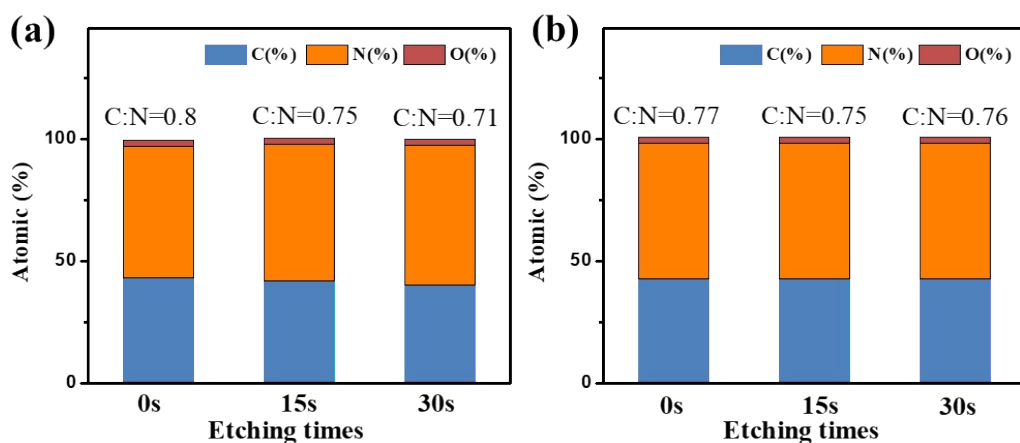

**Fig. S10** The surface C and N composition of different samples with the Ar ion etching process (0s, 15s and 30s) for samples (a) Janus- $C_3N_5$  and (b) Bulk- $C_3N_5$  samples.

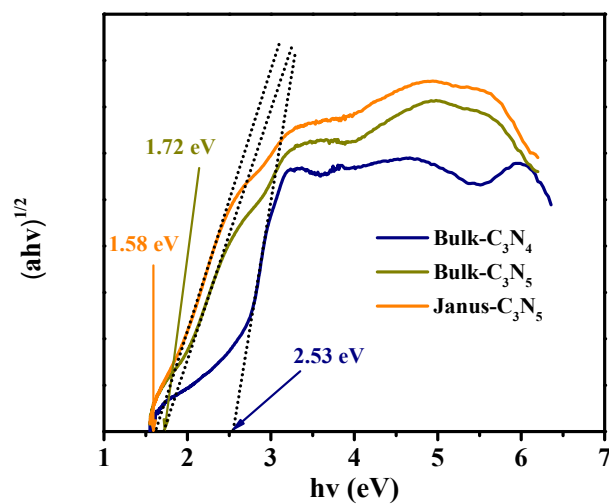

**Fig. S11** The band gap energies of Bulk- $C_3N_4$ , Bulk- $C_3N_5$  and Janus- $C_3N_5$  samples.

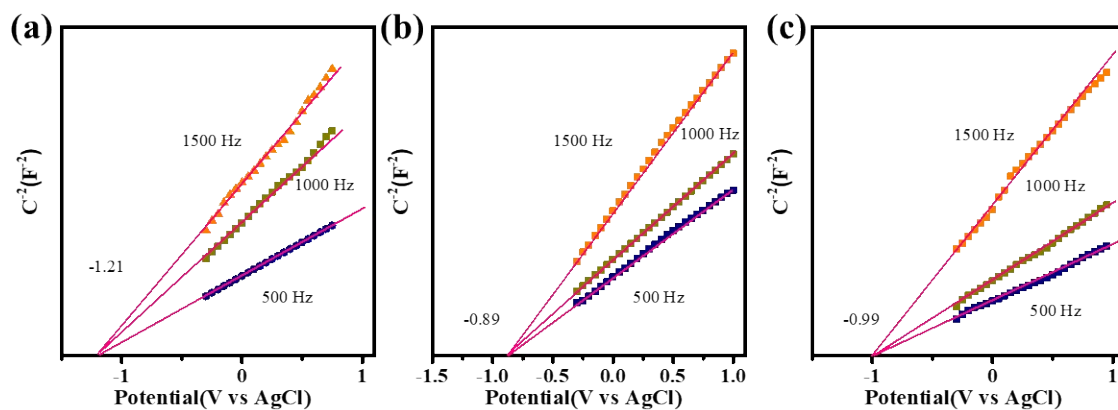

**Fig. S12** The Mott-Shottky curves of Bulk- $C_3N_4$ , Bulk- $C_3N_5$  and Janus- $C_3N_5$  samples.

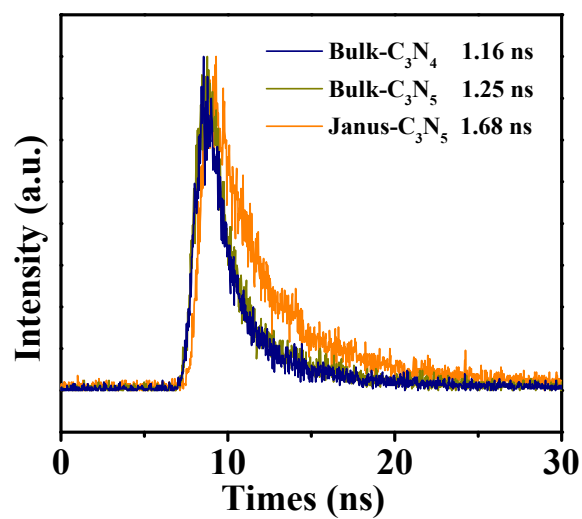

**Fig. S13** Photocurrent responses and time-resolved PL decay spectra of Bulk- $\text{C}_3\text{N}_4$ , Bulk- $\text{C}_3\text{N}_5$ , and Janus- $\text{C}_3\text{N}_5$  samples.

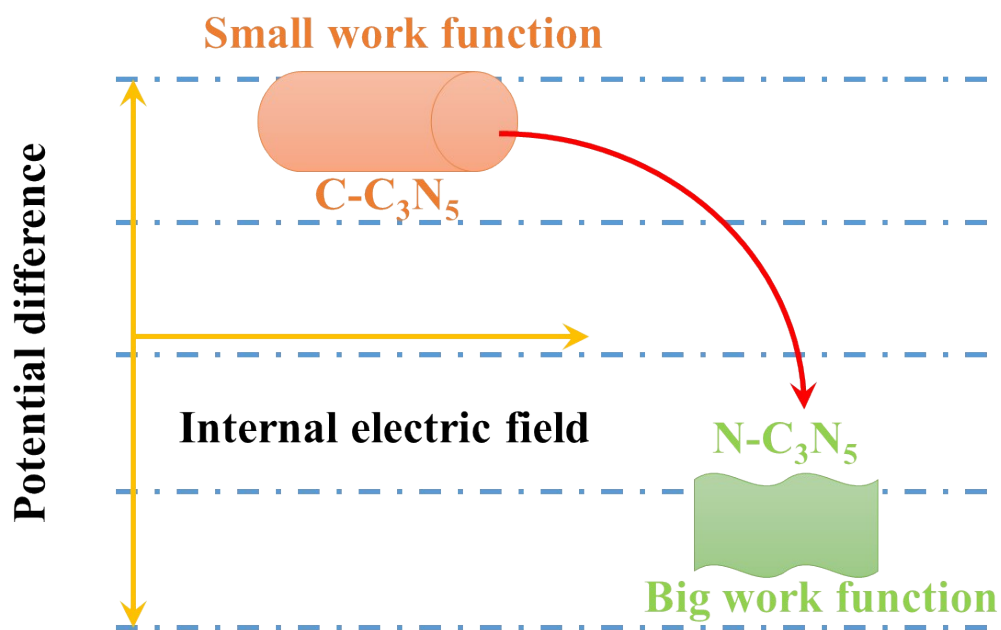

**Fig. S14** Schematic illustration of charge transport driven by potential difference.

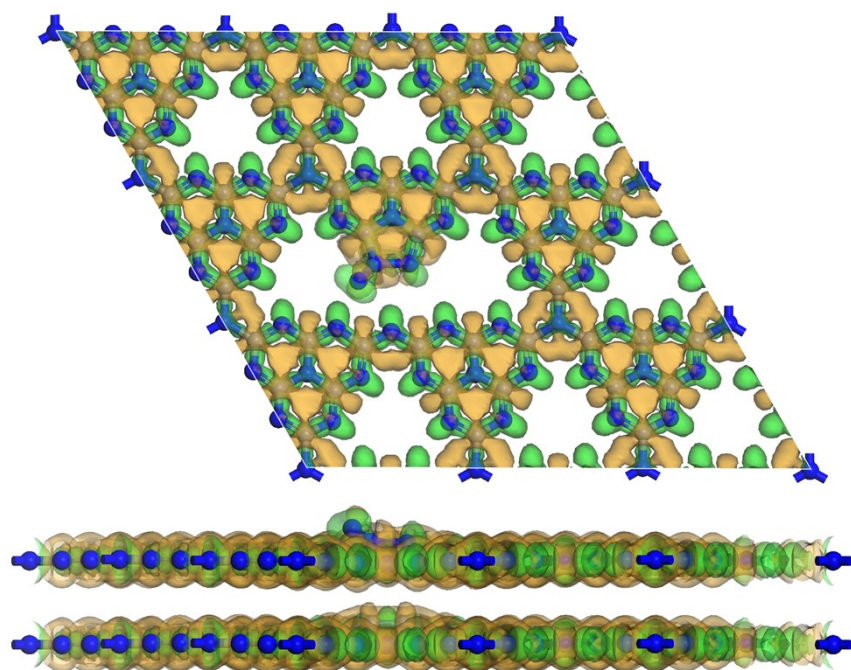

**Fig. S15** Charge density difference of CN-C<sub>3</sub>N<sub>5</sub> (yellow and blue represent the charge accumulation and loss, respectively).

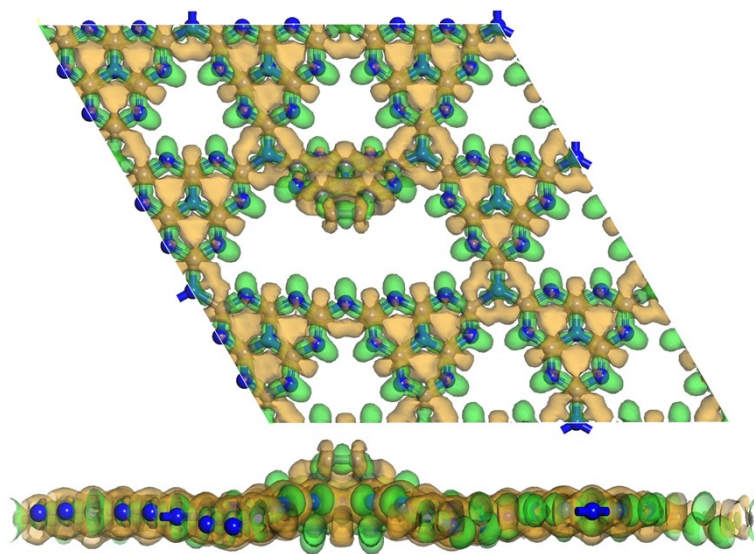

**Fig. S16** Charge density difference of C-C<sub>3</sub>N<sub>5</sub> (yellow and blue represent the charge accumulation and loss, respectively).

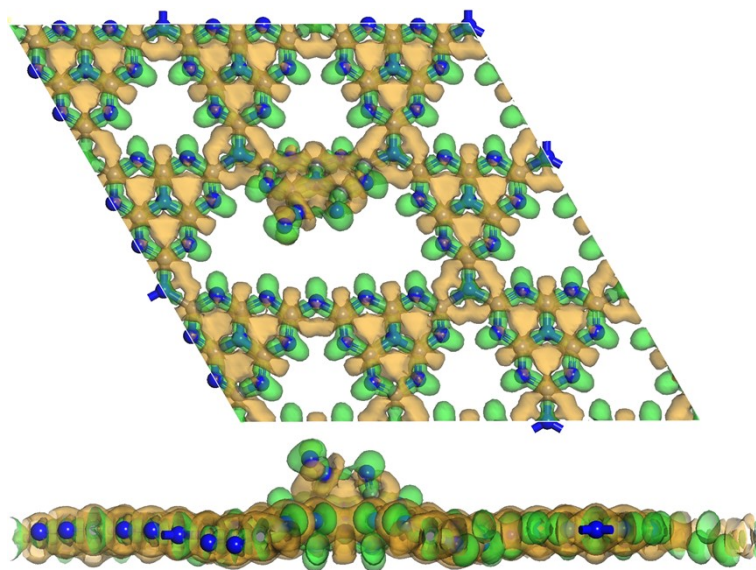

**Fig. S17** Charge density difference of N-C<sub>3</sub>N<sub>5</sub> (yellow and blue represent the charge accumulation and loss, respectively).
